# Supplementary material
Source: MDPI journal article supplement (https://www.mdpi.com/2077-1312/10/3/428)
Supplement: s1 [file s1]

Archive with 4 entries (4 files):
- Supplementary File 1.xlsx
- Supplementary File 2.xlsx
- Supplementary File 3.pdf
- Supplementary File 4.xlsx
