# Supplementary material
Source: MDPI journal article supplement (https://www.mdpi.com/2077-1312/10/3/428)
Supplement: s1 [file s1 › Supplementary File 1.xlsx]

## Sheet: primers information
Gene	Primer name	Primer sequence (5'--->3')
EVM0013809/cdc-42 (reference gene)	F	GCCACTAAGGCTATGTACGACCT
	R	TTCAACGTGAACCTTCTTTTCAA
EVM0009296/gars-1	F	GCCACTAAGGCTATGTACGACCT
	R	TTCAACGTGAACCTTCTTTTCAA
EVM0009790/nars-1	F	TCTCAGCTCTATTTGGAGACGTG
	R	CCACATGAGAATACTCAGCCAAG
EVM0003025/eif-6	F	GGTTTGCTAGTTCCAAATTCCAC
	R	AAAGTCTTTCATCAACACGACGA
EVM0016791/M01G5.3	F	CGCTATTTGTCACTTTCTGATGG
	R	CTACACAGGCGAGATAGTGATGG
EVM0007932/ZK795.3	F	TGTTACAACCAGCAGAGATCCAT
	R	GTCACATCATTGGCTCTACAAGC
EVM0017539/F14E5.1	F	ACGTCCTCTGATACTGTGGTCAA
	R	CGAAAACCCATATACAGCAAACA
EVM0007205/mct-6	F	ATTGAATACTGTGGGTCGTGTTG
	R	ACAGGGAAATGTAGGTGTCGAAT
EVM0014526/daf-37	F	CAGTTCTTTTCAATGCCACAAAG
	R	AAAGGGAAGAAATACCATCACGA
EVM0003946/frpr-1	F	GGGACCTGTGATTTTGCTTATTC
	R	TTCACTGTTAGCGGCAGTACATT
EVM0009311/gnrr-5	F	CCTTTTGGTCTCCGTACAATTTC
	R	TTGTTCTTTTGAAAGACGCCATA
