# Supplementary material
Source: MDPI journal article supplement (https://www.mdpi.com/2077-1312/10/3/428)
Supplement: s1 [file s1 › Supplementary File 2.xlsx]

## Sheet: 289 up-regulated DEGs
#ID	Homologous gene in C. elegans	DMSO-1_FPKM	DMSO-2_FPKM	DMSO-3_FPKM	SA-1_FPKM	SA-2_FPKM	SA-3_FPKM	FDR	log2FC	regulated	gene_description
EVM0016317	--	7.27111	6.86479	7.15891	34.5992	43.5875	39.8892	9.01491e-167	2.27015	up	Bacteroidetes VLRF1 release factor
EVM0016925	gln-2	5.55719	5.74263	5.12044	26.6351	29.3324	28.84	3.35561e-197	2.22024	up	Glutamine synthetase, catalytic domain
EVM0003204	asns-2	22.755	23.1434	16.1889	144.943	180.408	176.206	2.51984e-50	2.0601	up	Asparagine synthase
EVM0004641	C52D10.3	5.08335	6.52341	4.43367	21.9827	26.4154	25.342	4.71796e-76	1.90103	up	Domain of unknown function (DUF4139)
EVM0017138	C52D10.3	2.53495	3.43351	3.09073	12.9799	16.2783	17.0894	4.93445e-59	1.9002	up	N-terminal domain of unknown function (DUF4140)
EVM0004610	cgp-1	11.298	11.6817	11.3	36.8502	43.1926	43.0952	6.70357e-162	1.76598	up	Elongation factor Tu GTP binding domain
EVM0017104	--	62.1838	59.9662	61.9868	172.806	202.137	218.671	5.79102e-107	1.59533	up	CYTH domain
EVM0017499	ugt-22	4.43935	4.67584	4.87448	14.9106	15.7927	15.1114	2.75725e-86	1.58878	up	UDP-glucoronosyl and UDP-glucosyl transferase
EVM0001605	--	3.91768	4.53686	4.60741	12.1555	15.748	15.7127	7.99241e-58	1.54677	up	F-box domain
EVM0000952	F41C3.8	0.364825	0.310518	0.234129	2.99791	3.14307	2.65881	4.02403e-24	1.5417	up	--
EVM0007541	cyp-33C9	18.6373	18.1946	18.5561	49.2509	53.864	54.3554	8.42894e-122	1.45465	up	Cytochrome P450
EVM0014525	--	0.770403	0.492224	0.525148	3.47473	3.78673	3.02547	1.14911e-20	1.40774	up	--
EVM0013097	wht-1	1.07546	1.30966	1.24171	3.50941	4.02632	4.073	3.80486e-28	1.34542	up	ABC-2 type transporter
EVM0004715	swt-7	10.4653	10.1854	9.49781	25.7738	27.6892	27.9089	1.7018e-62	1.33521	up	Sugar efflux transporter for intercellular exchange
EVM0000837	Y39E4B.5	1.58025	1.60726	1.72416	4.20251	4.63943	5.51136	2.25311e-32	1.31033	up	Sugar (and other) transporter
EVM0006287	Y54E10A.17	17.3519	15.6245	17.1885	42.9439	47.9773	39.7435	5.38432e-50	1.27129	up	DOMON domain
EVM0003424	--	0.611092	0.463276	0.645557	2.34825	2.36349	2.75058	8.02377e-17	1.25783	up	--
EVM0010810	otpl-8	1.80482	1.73292	2.4063	5.02547	5.80516	5.59393	9.90757e-28	1.23326	up	Otopetrin
EVM0016392	--	93.4439	88.5138	94.2942	238.997	209.815	211.255	8.18015e-92	1.21984	up	Basic region leucine zipper
EVM0011495	Y54E10A.17	8.57885	6.63186	8.57298	21.1047	23.9545	19.1343	2.91272e-28	1.21659	up	DOMON domain
EVM0002044	F41E7.2	20.525	21.1672	20.0318	45.6422	50.1635	50.8289	5.02743e-89	1.21085	up	Sodium/hydrogen exchanger family
EVM0011704	--	4.74334	4.45214	5.13271	11.0953	14.0589	15.5737	2.64028e-20	1.17817	up	Lectin C-type domain
EVM0012605	hsp-17	46.1688	39.7511	54.8638	112.802	121.811	104.339	3.91761e-41	1.16742	up	Hsp20/alpha crystallin family
EVM0000276	F14E5.1	2.58368	3.15286	2.0369	6.71831	7.24714	6.77538	1.45243e-21	1.15308	up	Sugar (and other) transporter
EVM0008998	pyp-1	204.496	211.03	192.294	447.022	452.569	472.815	8.35645e-103	1.15188	up	Inorganic pyrophosphatase
EVM0009296	gars-1	98.0372	97.6642	91.3152	211.475	212.27	223.707	3.96934e-104	1.15105	up	Anticodon binding domain
EVM0002991	rop-1	3.58873	3.56572	4.56813	9.55431	9.00077	9.36594	4.81009e-39	1.14933	up	TROVE domain
EVM0017646	Y53F4B.39	24.8507	22.4345	25.1427	50.6766	53.1018	57.5707	5.19148e-55	1.10262	up	Metallo-beta-lactamase superfamily
EVM0001112	haf-2	11.9097	12.1419	13.2688	24.5735	28.8701	28.8699	1.99363e-51	1.08784	up	ABC transporter transmembrane region
EVM0000423	T04H1.2	18.6123	19.0436	18.9186	36.1663	42.6127	42.6926	6.63052e-58	1.06231	up	Elongation factor Tu GTP binding domain
EVM0012075	--	26.5739	21.8695	23.3586	49.8356	53.4937	51.5029	2.62189e-47	1.05323	up	--
EVM0010285	rop-1	41.0362	42.3096	43.1727	84.2478	87.7847	93.4807	1.19718e-86	1.05138	up	TROVE domain
EVM0003976	T16G1.6	6.70308	7.8611	7.53825	15.9027	16.5269	15.8967	1.78108e-34	1.0463	up	Protein of unknown function (DUF1679)
EVM0009790	nars-1	102.167	106.35	100.826	214.201	209.275	219.078	6.65204e-104	1.04319	up	tRNA synthetases class II (D, K and N)
EVM0012975	Y41D4A.1	5.64913	5.88961	8.17463	16.108	15.24	14.3407	7.53317e-21	1.04013	up	--
EVM0016211	xpo-3	28.436	28.5261	29.6777	54.7627	58.6499	66.1005	4.19781e-58	1.01831	up	Exportin 1-like protein
EVM0002463	F26F12.3	44.8999	42.7047	36.3396	79.424	93.6628	87.2022	2.48649e-38	1.00797	up	--
EVM0017158	--	4.45817	5.33035	4.14989	9.20584	10.4286	10.2192	5.0407e-23	0.982117	up	--
Caenorhabditis_elegans_newGene_1401	--	2.31621	2.43731	1.6395	3.92981	5.45526	5.38215	7.49201e-14	0.981337	up	--
EVM0002848	--	1.92988	2.25482	2.15912	7.27918	7.33071	6.61721	7.7887e-10	0.972577	up	--
EVM0011907	B0511.11	0.211825	0.249109	0.247618	0.850266	0.977382	0.891231	2.71779e-09	0.954211	up	--
Caenorhabditis_elegans_newGene_3382	--	6.85251	5.37564	5.95135	11.4889	10.7897	12.3498	5.09785e-23	0.948353	up	HORMA domain
EVM0010076	F58B4.5	5.97323	5.91346	6.41374	11.5636	12.8936	12.9076	1.94314e-23	0.936144	up	Protein of unknown function (DUF1679)
EVM0000282	znf-598	8.56994	8.93004	9.56834	16.3731	17.6361	18.7101	2.0366e-46	0.931811	up	--
EVM0003158	clec-1	2.13058	1.87967	2.06175	4.71698	4.52859	5.48996	4.19104e-11	0.931454	up	Lectin C-type domain
EVM0005345	srv-1	2.71597	2.89734	3.27217	5.39946	7.45174	6.60393	4.58978e-14	0.928208	up	Serpentine type 7TM GPCR chemoreceptor Srv
EVM0007454	--	0.644052	1.2193	0.857962	2.7048	4.5378	3.15976	1.70821e-08	0.910897	up	--
EVM0014850	--	1.45004	1.19858	0.92342	3.07547	2.92021	3.63531	4.70069e-09	0.905271	up	--
EVM0010494	--	37.7604	40.684	36.6371	67.8331	73.5942	78.7716	1.67075e-39	0.901497	up	--
EVM0004101	--	3.13775	2.79904	3.00789	5.95707	6.99339	6.3452	6.66439e-13	0.900119	up	--
EVM0015819	T16G1.6	4.79381	5.85346	6.31984	9.90725	13.1956	11.448	1.40292e-15	0.888103	up	Protein of unknown function (DUF1679)
EVM0010289	Y39B6A.41	1.82589	1.69317	1.69899	3.50569	4.12419	3.65581	1.4214e-11	0.881929	up	Sugar (and other) transporter
EVM0011976	--	2.07341	1.83501	1.43155	4.22569	4.48635	4.03772	3.57794e-09	0.873133	up	Phospholipase A2
EVM0002448	--	4.23728	3.34613	6.0854	11.5892	16.3475	14.3341	1.14626e-07	0.861889	up	--
EVM0014509	eef-1A.1	25.8006	26.4916	29.6552	50.7835	49.9057	48.6371	5.47299e-43	0.846061	up	Elongation factor Tu GTP binding domain
EVM0011932	ppat-1	1.07836	1.00274	0.860664	1.9906	2.45062	2.14313	5.2929e-09	0.842248	up	Glutamine amidotransferase domain
EVM0004825	F23F1.6	5.27195	5.77707	7.21804	11.4461	12.0961	11.0867	3.23445e-17	0.833914	up	Amino acid permease
EVM0001638	F56A4.5	33.8468	36.6678	38.6431	62.7743	67.9323	65.68	1.8115e-42	0.829901	up	Protein of unknown function (DUF1679)
EVM0000835	--	17.9738	17.1645	16.5082	31.2515	32.5077	29.4918	1.24508e-30	0.818691	up	SH2 domain
EVM0017539	F14E5.1	1.30853	1.3157	1.1006	3.61679	3.8378	3.6081	7.31013e-07	0.812278	up	Sugar (and other) transporter
EVM0004733	mics-1	37.4127	36.8688	40.0821	64.8697	66.3255	72.6274	3.88856e-35	0.809823	up	PDZ domain
EVM0016303	zip-11	2.1171	2.28701	1.64078	4.10207	4.15227	4.86226	4.18569e-08	0.805285	up	Basic region leucine zipper
EVM0013941	--	3.93904	3.55596	6.63337	10.7262	10.3544	9.0539	3.45068e-08	0.80143	up	--
EVM0008172	--	149.757	136.014	116.869	292.094	240.494	261.081	3.26359e-10	0.797962	up	--
EVM0000918	wars-1	16.8944	16.1419	16.9634	28.3381	29.0991	30.3879	1.36417e-37	0.79358	up	tRNA synthetases class I (W and Y)
EVM0013706	bcat-1	286.552	272.15	246.877	444.982	476.099	494.415	8.99525e-34	0.789079	up	Amino-transferase class IV
EVM0002402	--	0.422946	0.501685	0.696158	2.64303	2.92302	2.0535	9.08829e-07	0.785358	up	Beta/Gamma crystallin
EVM0003328	--	12.1027	10.7232	10.2915	20.4949	24.875	24.0693	1.8469e-07	0.770076	up	--
EVM0009316	R13H4.5	6.55898	5.9664	6.47168	12.5929	11.3562	11.1755	1.14056e-11	0.766366	up	--
EVM0013402	clec-50	8.66256	8.5128	9.63791	16.5621	15.8474	15.3292	7.1238e-16	0.76299	up	Lectin C-type domain
EVM0003073	slc-17.2	34.5285	36.0743	36.1782	57.2361	61.9411	62.952	2.90136e-43	0.761374	up	Major Facilitator Superfamily
EVM0001611	--	74.7637	70.5669	73.9055	124.151	127.748	121.213	1.02955e-38	0.754614	up	--
Caenorhabditis_elegans_newGene_387	--	0.217755	0.33936	0.349781	0.791574	1.02909	0.639358	6.02827e-06	0.751231	up	--
EVM0013588	blmp-1	1.18766	1.27216	1.31172	1.71556	2.71273	2.81083	3.45068e-08	0.745588	up	Zinc-finger double domain
EVM0001474	T23F4.2	29.9086	32.1629	33.3091	47.1226	60.891	57.0283	3.70144e-18	0.742558	up	--
EVM0007627	T23F4.2	7.60697	6.63802	8.59403	11.3357	15.5785	15.0258	1.0959e-09	0.738927	up	--
EVM0005537	ctg-2	16.4002	17.8793	18.7057	29.0723	28.9129	31.5522	1.1712e-24	0.731173	up	CRAL/TRIO domain
EVM0013816	pan-1	13.0969	14.1415	13.874	21.4598	23.5089	23.8912	3.56307e-30	0.727444	up	Leucine rich repeat
EVM0008195	best-24	1.36967	1.38642	1.33027	2.31963	2.60187	2.53036	3.8872e-09	0.72447	up	Bestrophin, RFP-TM, chloride channel
EVM0007463	gcy-23	1.26155	1.21378	1.15551	2.21954	2.19342	2.2527	9.73401e-09	0.723319	up	Adenylate and Guanylate cyclase catalytic domain
EVM0010387	faah-2	1.05074	1.1681	0.932042	1.83752	1.88583	2.05396	2.4906e-08	0.716229	up	Amidase
EVM0000491	best-4	1.45928	1.26393	1.06867	2.29594	2.59781	2.26134	3.76986e-07	0.707596	up	Bestrophin, RFP-TM, chloride channel
EVM0001094	F35D11.4	26.6568	26.0798	23.6225	39.8387	43.6371	44.4329	3.53414e-19	0.707307	up	CYTH domain
EVM0000094	twk-36	12.8844	12.3767	9.7911	19.6346	18.6163	21.7586	3.36883e-13	0.706303	up	Ion channel
EVM0007440	mam-1	0.67291	0.477558	0.69017	1.0279	1.29057	1.53586	8.38097e-06	0.703646	up	MAM domain, meprin/A5/mu
EVM0003824	abt-4	15.3675	14.9473	16.3186	24.2689	26.0291	25.9316	2.25795e-35	0.701122	up	ABC-2 family transporter protein
EVM0016647	C31H5.6	16.8069	16.9186	18.8448	24.0415	30.6877	34.9592	1.99027e-12	0.70087	up	BAAT / Acyl-CoA thioester hydrolase C terminal
EVM0009634	--	5.87065	5.7892	5.95267	8.73515	11.185	9.51243	6.05064e-16	0.696141	up	XRCC1 N terminal domain
EVM0002350	--	5.06229	5.24752	5.85671	9.18384	9.67786	9.56363	4.96006e-09	0.696078	up	Haem-transporter, endosomal/lysosomal, haem-responsive gene
EVM0010612	gcy-23	0.388093	0.357832	0.413324	0.834107	0.83066	0.751636	1.63451e-05	0.688024	up	Adenylate and Guanylate cyclase catalytic domain
EVM0016286	--	11.122	11.8439	14.5009	24.2847	19.5255	22.1847	2.44463e-08	0.687384	up	--
EVM0008089	slc-17.2	0.651346	0.716646	0.951746	1.53242	1.34777	1.68544	8.10677e-06	0.685336	up	Major Facilitator Superfamily
EVM0005111	--	1.2469	1.28185	1.03976	1.91595	2.79555	2.52078	1.81764e-05	0.679692	up	F-box domain
EVM0006411	odc-1	27.851	30.4259	34.827	47.0983	49.4935	53.2912	1.65255e-20	0.666112	up	Pyridoxal-dependent decarboxylase, pyridoxal binding domain
EVM0009573	plin-1	55.684	56.2896	58.3852	84.8774	89.3323	97.4742	3.92698e-29	0.664456	up	Perilipin family
EVM0003283	lgc-44	4.61007	4.60693	5.25306	7.37373	8.94876	7.62905	5.70754e-11	0.660485	up	Neurotransmitter-gated ion-channel ligand binding domain
EVM0005047	mxl-3	17.8756	18.435	17.5677	25.8014	29.3516	31.7324	1.59561e-15	0.654946	up	Helix-loop-helix DNA-binding domain
EVM0011858	pgp-9	1.91857	1.99111	2.58974	3.37167	3.5944	3.74047	6.045e-10	0.64907	up	ABC transporter transmembrane region
EVM0001621	abt-4	1.14741	1.09769	1.34408	1.86012	2.13205	1.94499	3.51404e-09	0.645498	up	ABC transporter
EVM0003002	aat-5	12.4254	13.0449	13.0585	18.9948	20.4481	21.1717	3.42043e-23	0.641108	up	Amino acid permease
EVM0015984	ZK418.7	3.61788	3.30186	3.16534	5.13007	5.78553	6.03306	2.10842e-07	0.635911	up	7 transmembrane receptor (rhodopsin family)
EVM0009859	atfs-1	79.9037	83.3631	88.1653	133.108	128.951	129.038	7.57712e-33	0.635569	up	Basic region leucine zipper
EVM0016821	E02C12.6	4.53376	3.90444	4.69001	7.2364	6.89638	7.17553	5.84542e-10	0.633148	up	Protein of unknown function (DUF1679)
EVM0005836	pitr-3	1.49179	1.07835	1.56977	2.99505	2.31204	2.14613	2.48919e-05	0.627573	up	Phosphate transporter family
EVM0017088	clec-198	4.86153	4.47668	4.186	6.51201	7.82785	7.90853	1.43022e-07	0.620739	up	Lectin C-type domain
Caenorhabditis_elegans_newGene_2171	--	0.629883	0.835484	0.769936	1.05647	1.71672	1.58505	0.000166492	0.620448	up	--
EVM0008331	trip-4	6.33192	7.18692	6.58121	9.19863	11.0233	11.504	4.26486e-10	0.607812	up	Putative zinc finger motif, C2HC5-type
EVM0016903	--	0.744657	0.876511	1.05863	1.55506	1.34844	1.66361	2.78215e-05	0.600097	up	BRCT domain, a BRCA1 C-terminus domain
EVM0009226	Y54G9A.9	141.966	140.31	145.355	203.584	219.039	225.354	1.93144e-31	0.59963	up	Protein kinase domain
EVM0016352	hpd-1	406.072	417.97	364.402	581.118	612.556	616.601	1.0633e-21	0.59728	up	Glyoxalase/Bleomycin resistance protein/Dioxygenase superfamily
EVM0003985	cars-1	16.4201	15.8549	16.1573	23.1961	25.4035	25.0944	8.71327e-22	0.596908	up	tRNA synthetases class I (C) catalytic domain
EVM0007205	mct-6	76.7013	77.5354	77.1647	104.394	119.777	128.155	9.60049e-19	0.593556	up	Major Facilitator Superfamily
EVM0003604	abt-4	4.70499	4.28629	4.95109	8.1329	7.77248	6.32487	1.8469e-07	0.593113	up	ABC transporter
EVM0015898	ctg-2	17.7336	19.5176	18.4603	26.2184	27.9573	30.6048	6.25017e-14	0.58323	up	CRAL/TRIO domain
EVM0000124	F25B5.6	36.2133	32.8036	25.9686	52.3858	50.4968	55.308	3.48615e-05	0.581696	up	Mur ligase middle domain
EVM0013480	hmt-1	1.74967	2.02516	1.74407	2.73725	2.83173	3.27579	3.02447e-06	0.580637	up	ABC transporter transmembrane region
EVM0003025	eif-6	147.804	154.082	153.096	213.662	232.711	234.621	1.9349e-25	0.579861	up	eIF-6 family
EVM0005025	trip-4	9.43863	9.6285	9.25193	13.5392	14.2632	15.3375	2.57711e-12	0.578833	up	Putative zinc finger motif, C2HC5-type
EVM0017035	F53H1.1	4.01891	4.09844	4.00081	5.6991	6.36219	6.55526	1.16658e-09	0.576028	up	DEAD/DEAH box helicase
EVM0004082	Y43F8B.3	0.67399	0.673393	0.684978	1.32356	1.02394	1.04595	7.25694e-05	0.573454	up	Kunitz/Bovine pancreatic trypsin inhibitor domain
EVM0004219	mfsd-8	15.052	16.4399	14.4632	21.0792	23.8511	24.6113	2.21789e-12	0.571809	up	Major Facilitator Superfamily
EVM0011256	nfx-1	7.87849	7.7351	7.64155	12.0133	11.3067	11.5425	1.21884e-16	0.569908	up	R3H domain
Caenorhabditis_elegans_newGene_1014	--	3.46936	3.1659	4.23231	5.74217	5.14683	6.30523	6.41578e-06	0.564426	up	--
EVM0000438	Y54E10A.11	6.52845	6.62257	6.87302	9.44712	10.0674	10.2494	3.51047e-18	0.563349	up	Ring finger domain
EVM0004027	--	4.26725	3.90557	4.25537	5.18934	7.56022	6.62309	2.55898e-06	0.558886	up	--
EVM0004501	phat-1	15.8559	15.8102	15.7151	24.8677	23.0667	23.1007	1.14056e-11	0.557914	up	ShK domain-like
EVM0006470	lap-2	64.3079	70.9357	66.8008	94.7665	95.8203	107.654	1.63546e-19	0.556155	up	Cytosol aminopeptidase family, catalytic domain
EVM0001098	ZK1055.7	9.95797	9.39077	12.5737	17.4912	14.5725	16.2294	1.1228e-08	0.55444	up	Domain of unknown function (DUF4139)
EVM0006636	nadk-1	1.88115	2.04369	1.71275	2.65462	3.5766	3.07593	0.000197685	0.553303	up	ATP-NAD kinase
EVM0001645	dpy-6	0.339389	0.223584	0.344611	0.489389	0.731429	0.46731	0.00126847	0.552501	up	--
EVM0011818	hap-1	42.3891	46.8076	44.2779	61.1144	65.5626	71.5895	1.09469e-12	0.551976	up	Ham1 family
EVM0003150	slc-17.2	23.0679	24.1369	23.413	32.347	36.0202	35.3491	5.60505e-18	0.548153	up	Major Facilitator Superfamily
EVM0006827	pho-13	3.08705	3.47886	3.82661	4.96126	5.76476	5.12202	2.3968e-06	0.541306	up	Histidine phosphatase superfamily (branch 2)
EVM0013900	rnt-1	0.320854	0.356971	0.501158	0.665568	0.707394	1.03824	0.00237705	0.540114	up	Runt domain
EVM0013029	cyn-9	13.5304	13.209	12.9393	19.2436	18.8695	19.9515	9.97202e-16	0.539232	up	Cyclophilin type peptidyl-prolyl cis-trans isomerase/CLD
EVM0005690	zip-4	39.0908	37.1274	44.0371	59.018	57.5142	58.6176	5.64324e-17	0.536515	up	Basic region leucine zipper
EVM0001039	lron-2	1.74325	2.25117	1.7829	3.1727	2.80674	3.18594	0.000174499	0.533795	up	Leucine rich repeat
EVM0016624	blmp-1	0.534528	0.495684	0.552161	0.761802	0.867091	1.04088	0.000938719	0.533776	up	Zinc-finger double domain
EVM0011954	gcy-7	1.71214	2.04429	2.56078	3.12944	3.46913	3.13146	2.63492e-05	0.532799	up	Adenylate and Guanylate cyclase catalytic domain
EVM0009550	--	3.11899	2.49925	2.68013	3.81642	4.76801	4.37234	0.000238326	0.517658	up	--
EVM0009109	F54C9.9	5.89547	5.28082	5.77206	7.80586	8.3951	8.47789	2.47783e-09	0.515564	up	KRI1-like family C-terminal
EVM0013195	pcf-11	7.63219	7.8779	7.20843	10.7283	10.9929	11.7671	1.05515e-06	0.511599	up	--
EVM0001158	--	1.32057	1.11647	0.906493	2.06874	1.95995	2.04255	0.00388264	0.510682	up	Lectin C-type domain
EVM0006987	pqm-1	33.0448	33.337	32.2554	49.7925	45.6671	45.0863	6.09386e-17	0.50789	up	--
EVM0004752	C16A3.6	25.7266	24.1782	25.7846	35.4782	36.9907	35.5347	1.12779e-14	0.506464	up	Ribosomal L28e protein family
EVM0006976	ttm-2	3.86797	3.82521	4.74386	5.78373	6.49366	6.19409	1.91736e-05	0.503517	up	Arrestin (or S-antigen), C-terminal domain
EVM0000476	--	9.03973	8.53382	9.08345	12.6154	12.1723	13.3641	4.2879e-11	0.501999	up	--
EVM0009908	endu-2	92.1429	92.8442	80.6623	120.322	124.792	133.393	5.49307e-13	0.500535	up	Endoribonuclease XendoU
EVM0015700	ttm-5	8.62379	8.73355	9.047	11.8398	12.7462	14.0197	3.19511e-06	0.499528	up	Fatty acid desaturase
EVM0007787	glna-2	3.3469	3.81012	3.68461	5.23148	5.23194	5.32272	1.8158e-06	0.498024	up	Glutaminase
EVM0001162	T25D10.4	14.0227	13.8944	15.8686	17.6949	21.2089	24.6987	9.94483e-07	0.497994	up	--
EVM0010276	--	2.40545	2.31069	2.85499	3.38088	3.56151	4.29004	3.94419e-05	0.497857	up	Prominin
EVM0000001	--	5.92757	6.4292	5.80345	7.74079	10.2518	9.24167	0.000118155	0.497419	up	bZIP transcription factor
EVM0015527	E01G4.3	290.748	291.967	298.339	395.114	409.977	434.526	5.23306e-22	0.496222	up	--
EVM0008505	T04B2.3	1.39253	1.64355	1.28268	2.2617	2.06226	2.72598	0.00266967	0.49603	up	--
EVM0009174	B0403.3	0.699935	0.87029	0.766908	1.18145	1.95078	1.70111	0.00624549	0.495631	up	--
EVM0006219	aatf-1	33.066	33.1623	36.1157	47.3691	46.6866	50.0972	8.67908e-17	0.493496	up	Apoptosis antagonizing transcription factor
EVM0013690	--	2.64672	3.43418	4.0892	4.20416	5.42732	6.47499	0.00216681	0.491688	up	--
EVM0007961	ZC21.3	58.2963	57.4899	60.5571	79.1694	86.5997	81.7957	1.91203e-18	0.490909	up	--
EVM0008030	cah-4	61.2781	67.8772	70.5192	82.2069	101.708	116.731	0.000454532	0.486621	up	Eukaryotic-type carbonic anhydrase
EVM0016757	gpn-1	0.405196	0.536837	0.568201	0.923497	1.03527	0.866969	0.00799632	0.483541	up	Glypican
EVM0008989	nhr-28	6.48979	4.2028	4.77305	6.44765	9.49181	7.77711	0.00123842	0.482194	up	Ligand-binding domain of nuclear hormone receptor
EVM0007002	--	7.54908	7.15508	6.9779	9.83495	10.2583	11.0103	1.71356e-06	0.481682	up	HORMA domain
EVM0015704	Y71F9B.2	13.0084	12.76	13.7466	17.9206	18.7884	18.892	8.09148e-11	0.481314	up	Phosphatidate cytidylyltransferase, mitochondrial
EVM0010512	C49H3.3	144.565	140.333	147.608	182.589	215.636	208.482	1.7232e-11	0.47969	up	Learning-associated protein
EVM0009373	--	10.0968	12.1845	12.5084	16.7645	17.099	15.6584	1.01902e-06	0.477845	up	u-PAR/Ly-6 domain
EVM0002982	T27D12.1	18.0272	19.5703	21.6564	27.3908	24.4526	32.0552	1.72876e-07	0.476915	up	Major Facilitator Superfamily
EVM0008685	K07F5.14	10.0567	10.6655	9.50624	13.0107	14.5454	15.3072	2.78568e-07	0.475652	up	--
EVM0003726	C27B7.2	5.48926	3.83041	6.29969	8.14241	8.18265	7.68211	0.00239877	0.471909	up	Uncharacterized conserved protein (DUF2358)
EVM0003591	Y61A9LA.1	7.36219	8.1892	8.85195	11.4345	10.9162	11.8997	4.44772e-08	0.470295	up	Sugar (and other) transporter
EVM0013055	nape-2	1.22852	1.14067	1.24732	1.5924	2.45139	1.80407	0.00613385	0.469557	up	Beta-lactamase superfamily domain
EVM0003615	T27F6.8	13.0703	13.4593	15.8034	20.2145	18.9073	20.085	1.257e-08	0.468551	up	--
EVM0011569	gcy-29	0.755177	0.890954	0.843448	1.54178	1.15316	1.75361	0.0106082	0.468452	up	Adenylate and Guanylate cyclase catalytic domain
EVM0000145	dnj-9	18.6142	18.9062	18.8076	25.4342	24.9696	27.7607	1.14553e-12	0.468338	up	Domain of unknown function (DUF3395)
EVM0001943	emb-4	9.11298	9.47288	9.21241	13.3087	12.1957	12.993	5.67263e-14	0.46785	up	Intron-binding protein aquarius N-terminus
EVM0009222	dmd-9	1.70525	2.26594	1.77376	3.43554	2.94171	2.81909	0.00614356	0.467283	up	DM DNA binding domain
EVM0004603	Y53G8B.2	3.84658	4.8502	4.45125	5.44885	6.16119	7.76455	0.00078054	0.466976	up	Diacylglycerol acyltransferase
EVM0016387	hxk-1	7.64003	7.55519	7.35837	10.4523	10.6805	10.2106	3.15936e-10	0.464587	up	Hexokinase
EVM0015194	--	12.7036	13.5863	13.3094	16.8404	19.3597	19.6489	2.29908e-06	0.464493	up	rRNA processing
Caenorhabditis_elegans_newGene_3431	--	7.75893	8.13751	9.18589	11.341	10.5948	13.5599	7.59839e-06	0.46438	up	--
EVM0001517	Y52B11A.10	10.4187	10.5717	10.3126	14.2468	13.7464	15.4559	1.63384e-10	0.464054	up	MA3 domain
EVM0014626	gpx-5	176.992	190.083	215.692	278.328	273.736	252.606	4.48864e-12	0.463202	up	Glutathione peroxidase
EVM0008960	Y17G7B.12	11.5748	12.3972	11.7235	15.4635	16.928	17.3044	1.10856e-08	0.463098	up	Exonuclease
EVM0009202	arrd-11	18.2141	18.4139	20.6768	25.7661	25.2383	28.6393	4.29508e-09	0.462781	up	Arrestin (or S-antigen), N-terminal domain
Caenorhabditis_elegans_newGene_2676	--	0.973175	0.812953	0.974306	1.18635	1.76297	1.66022	0.00996167	0.461602	up	--
EVM0015459	tatn-1	544.422	524.748	459.185	699.19	700.514	714.471	1.88926e-11	0.46078	up	Aminotransferase class I and II
EVM0011266	eif-1.A	285.298	283.695	281.269	382.653	392.27	389.309	3.16261e-21	0.459515	up	Translation initiation factor 1A / IF-1
Caenorhabditis_elegans_newGene_2743	--	7.65071	6.67391	6.34757	7.61788	12.6563	10.0961	0.00228954	0.457355	up	--
EVM0005164	twk-36	13.5084	13.7977	12.2352	17.6543	17.0611	20.3147	8.50805e-08	0.457168	up	Ion channel
EVM0005475	Y61A9LA.1	0.875008	0.713283	1.52797	1.69521	1.94438	1.64727	0.0121054	0.45627	up	Sugar (and other) transporter
EVM0000753	Y17G7B.12	6.23492	5.90255	6.57712	8.4767	9.32685	8.63744	2.56807e-05	0.45603	up	Exonuclease
EVM0017169	F25B5.3	3.79103	4.01565	4.41119	5.64936	5.74432	6.14636	0.000300544	0.454899	up	Pyrimidine 5'-nucleotidase (UMPH-1)
EVM0003723	F54C9.9	11.2952	10.6966	11.2966	14.5768	15.6433	15.6998	9.7393e-10	0.454526	up	KRI1-like family C-terminal
EVM0016623	--	6.38141	6.29668	6.23938	9.14424	8.89327	8.38034	2.14717e-06	0.452718	up	--
EVM0015107	Y37E11B.5	4.85089	4.81337	5.03535	6.77257	6.64279	7.05502	1.31739e-06	0.452296	up	Dihydrouridine synthase (Dus)
EVM0004804	F25B5.3	13.7066	14.434	14.5216	20.1253	20.1781	18.5967	5.06968e-08	0.450386	up	Pyrimidine 5'-nucleotidase (UMPH-1)
EVM0006687	sma-3	30.6294	30.5253	30.8502	41.5778	41.883	41.972	1.68249e-15	0.449659	up	MH2 domain
Caenorhabditis_elegans_newGene_2081	--	0.648446	0.627504	0.8998	1.34675	1.56696	1.09244	0.0159968	0.448584	up	--
EVM0007659	K07E8.7	8.25586	9.36378	10.3868	11.8331	13.3697	13.6854	5.00568e-06	0.44759	up	RNA pseudouridylate synthase
EVM0002282	C51E3.9	1.50913	1.73764	2.52402	3.15372	2.55646	3.32003	0.00998353	0.444418	up	Methyltransferase domain
EVM0014749	Y46E12BL.2	43.6386	44.9489	44.4985	62.8699	56.3984	61.2771	1.40292e-15	0.443239	up	NUC173 domain
EVM0001857	lact-6	1.51568	1.16525	1.22612	1.78876	2.14713	2.30382	0.013078	0.440729	up	Beta-lactamase
EVM0000321	F41C3.2	3.13212	3.12575	3.64751	5.32637	4.11372	4.80891	0.0014214	0.439809	up	Major Facilitator Superfamily
EVM0015490	hsd-3	2.5784	2.25698	3.72344	4.98639	4.29757	3.72107	0.00894896	0.437309	up	3-beta hydroxysteroid dehydrogenase/isomerase family
EVM0016430	T01B7.5	9.05781	9.68224	10.4264	13.1423	13.1275	13.4192	1.1468e-08	0.4368	up	Sas10 C-terminal domain
EVM0007897	--	4.58899	4.50004	4.78005	5.8574	6.959	7.29188	0.00260861	0.436585	up	--
EVM0009434	T26E3.4	17.2727	18.3965	20.1921	23.659	26.0789	26.4702	8.3613e-08	0.43638	up	RWD domain
EVM0004223	K11H12.8	61.1531	59.2346	60.1116	78.008	78.9643	87.1686	6.60094e-13	0.436061	up	Inhibitor of apoptosis-promoting Bax1
EVM0014906	C54E4.5	15.616	16.4908	15.1644	20.9961	21.2344	22.4616	4.31231e-07	0.436006	up	Myo-inositol oxygenase
EVM0003319	eif-2Bdelta	12.0753	12.1963	12.8233	16.6073	17.2799	16.4257	2.58259e-10	0.435981	up	Initiation factor 2 subunit family
EVM0005438	Y46E12BL.2	11.9642	11.6214	11.226	15.8854	14.7539	16.616	2.73481e-10	0.435659	up	NUC173 domain
EVM0004894	tin-44	46.0241	50.3509	47.6281	62.1693	61.9832	71.115	3.15936e-10	0.43552	up	Tim44-like domain
EVM0015200	pam-1	18.3824	19.6998	19.6281	26.955	24.5025	26.4669	4.24525e-12	0.433626	up	Peptidase family M1 domain
EVM0016855	galt-1	0.843886	0.820968	0.749223	1.5602	1.26745	1.0903	0.0172784	0.432446	up	Glycosyltransferase family 92
EVM0003008	ruvb-1	39.6845	42.8664	45.822	57.9484	55.6543	59.5566	9.79076e-12	0.432323	up	TIP49 P-loop domain
EVM0001331	let-355	12.0534	13.3967	15.3646	17.7121	18.658	19.0354	1.29756e-07	0.430555	up	Helicase associated domain (HA2)
EVM0015211	eef-1A.1	55.3094	57.8379	57.2992	79.9618	72.7372	76.42	7.73044e-14	0.429721	up	Elongation factor Tu GTP binding domain
EVM0007953	rrp-1	1.082	0.681286	1.15349	1.46838	1.94886	1.4125	0.0204333	0.429515	up	Nucleolar protein,Nop52
EVM0009170	nas-31	8.44772	7.8366	9.73448	12.629	12.3679	10.7862	2.33861e-05	0.429148	up	Astacin (Peptidase family M12A)
EVM0005415	--	21.2706	21.727	22.3485	27.5188	33.362	31.8659	0.00177916	0.428593	up	--
EVM0011469	spr-2	26.3397	29.5824	30.2294	37.0305	38.6046	40.4166	1.03459e-08	0.424602	up	Nucleosome assembly protein (NAP)
EVM0007984	CC8.2	58.4104	66.6162	78.3567	84.5582	95.902	110.211	0.00352074	0.424281	up	Carbohydrate/starch-binding module (family 21)
EVM0004405	F30B5.4	7.10655	7.5819	9.44928	9.06278	11.7458	12.5458	0.000245493	0.424033	up	Pyridine nucleotide-disulphide oxidoreductase
EVM0013541	clec-3	55.4294	57.896	60.0086	76.0253	79.2859	76.2945	4.90579e-14	0.422745	up	Lectin C-type domain
EVM0010861	B0361.6	12.2839	11.8889	12.621	16.0841	16.2315	17.2822	2.86996e-08	0.42225	up	Putative RNA methyltransferase
EVM0013442	cir-1	11.6639	10.7668	11.4025	15.1304	15.0725	15.5994	1.28392e-06	0.420188	up	N-terminal domain of CBF1 interacting co-repressor CIR
EVM0015133	--	14.0682	13.3026	13.6115	17.2799	17.5645	20.3294	4.2554e-08	0.419958	up	Nuclear pore protein 84 / 107
EVM0016427	C37C3.2	269.559	267.864	267.279	387.264	336.164	351.489	2.64411e-12	0.41956	up	Domain found in IF2B/IF5
EVM0010001	magu-2	1.76648	1.7318	2.20496	2.28778	2.9068	2.79743	0.00215366	0.416071	up	Guanylate kinase
EVM0013948	F35C11.6	7.34753	7.64627	11.077	12.2408	12.2769	12.2825	0.00376244	0.415671	up	--
EVM0003795	--	1.40461	1.26606	3.18373	5.91826	5.10459	3.98574	0.0158947	0.415426	up	--
EVM0005414	rpoa-12	80.958	87.2168	86.5208	101.816	122.259	117.961	3.49947e-07	0.415382	up	Transcription factor S-II (TFIIS)
EVM0002968	C34C6.4	8.86532	9.88188	10.621	12.5117	12.8727	14.052	4.26251e-07	0.414997	up	GMC oxidoreductase
EVM0004833	B0205.12	12.8518	9.90439	9.53173	17.2439	14.8801	17.7401	0.0199435	0.414468	up	Domain of unknown function (DUF4535)
EVM0009093	dach-1	4.05865	4.48911	5.33331	6.1363	6.92049	5.89504	0.000190382	0.413583	up	Cytochrome P450
EVM0010195	F26G1.2	34.934	33.6669	39.6702	45.4433	51.2892	49.2777	8.10677e-06	0.412959	up	--
EVM0014464	K01C8.1	42.2785	42.0755	39.4221	54.105	54.6077	55.8271	3.01585e-11	0.411417	up	Pyridoxal-phosphate dependent enzyme
EVM0012743	daao-1	10.6219	12.0062	9.60124	11.6906	15.1175	18.0059	0.00177916	0.411322	up	FAD dependent oxidoreductase
EVM0016791	M01G5.3	40.6237	40.389	37.6152	55.963	54.4314	48.2608	9.2538e-08	0.411015	up	TMPIT-like protein
EVM0013276	--	0.571694	0.355405	0.452261	0.793302	0.820367	0.801662	0.0315523	0.410048	up	--
EVM0011255	Y54E5A.5	91.1409	91.7055	96.7304	116.584	128.604	125.873	1.85924e-10	0.40934	up	Polysaccharide biosynthesis
EVM0003069	F26G1.2	63.4233	69.4279	79.3858	90.8716	101.46	90.1792	6.20265e-08	0.408824	up	--
EVM0010108	--	24.3646	21.258	26.0393	33.3032	31.1333	32.4543	3.6225e-05	0.40843	up	RWD domain
EVM0015628	fmo-1	11.0922	11.7006	10.5432	13.2764	15.8792	15.663	1.4035e-05	0.407069	up	Flavin-binding monooxygenase-like
EVM0003237	--	29.954	27.4964	35.7703	39.66	49.8233	37.7108	0.000658	0.405391	up	--
EVM0008796	F42A10.6	99.7754	87.5792	82.7966	117.521	123.641	119.275	3.79854e-07	0.405088	up	--
Caenorhabditis_elegans_newGene_2835	--	1.18362	0.950273	1.3311	1.79584	1.62549	1.56232	0.0104132	0.404746	up	--
EVM0003176	cyk-7	8.33038	7.40678	8.03591	10.0353	11.0107	11.128	0.000124756	0.404722	up	BTB/POZ domain
EVM0008939	Y54E2A.4	3.77068	3.6939	3.65837	4.80618	4.84771	5.11941	3.4838e-08	0.404317	up	Sec63 Brl domain
EVM0000117	rege-1	8.01354	8.60426	8.06111	10.2518	10.883	11.7433	1.11422e-06	0.403516	up	Zc3h12a-like Ribonuclease NYN domain
EVM0013014	--	9.08273	8.2998	8.2902	11.238	12.599	11.9059	0.00354726	0.403222	up	--
EVM0002268	F29A7.6	13.7862	13.9582	14.3542	18.3358	19.1334	18.855	1.29806e-05	0.401997	up	M-phase phosphoprotein 6
EVM0003514	T26E3.4	4.16295	4.50878	4.35289	6.56237	5.17816	6.25005	0.00271827	0.401611	up	RWD domain
EVM0011158	kars-1	136.532	135.055	135	189.116	167.861	178.595	2.28078e-12	0.40146	up	tRNA synthetases class II (D, K and N)
EVM0016025	T05H10.4	3.15664	2.80147	2.86354	3.5245	4.45284	4.22476	0.00356795	0.398266	up	--
EVM0000591	isy-1	14.9256	14.057	16.2121	19.0444	19.6597	21.4886	8.81057e-06	0.398156	up	Isy1-like splicing family
EVM0014874	--	0.801037	1.17743	0.776501	1.60311	1.49344	1.24257	0.0340792	0.397232	up	--
EVM0004855	C31H5.6	1.67779	1.88951	1.75555	2.52084	2.94339	2.40008	0.0229095	0.396969	up	Acyl-CoA thioester hydrolase/BAAT N-terminal region
EVM0008305	--	36.6219	32.7583	44.7034	48.7798	59.7515	46.188	0.000969034	0.396499	up	--
EVM0000578	nol-10	1.39697	1.61332	1.56755	1.80661	2.17447	2.42823	0.0089822	0.396018	up	NUC153 domain
EVM0007932	ZK795.3	25.1191	24.9915	26.3374	32.0778	34.2826	34.6944	4.31231e-07	0.395361	up	Brix domain
EVM0013635	F27C1.6	44.2081	46.597	45.1553	56.7237	60.663	60.6649	4.24548e-12	0.394159	up	Utp14 protein
EVM0016607	F32D8.5	3.3545	3.82384	3.48874	4.61316	5.23747	5.50564	0.0183962	0.393609	up	Assembly, mitochondrial proton-transport ATP synth complex
EVM0012457	dnj-9	8.7963	9.90782	10.2896	13.7133	11.995	12.6777	5.45926e-06	0.393205	up	Domain of unknown function (DUF3395)
EVM0013452	--	22.3664	19.9987	22.641	28.1585	26.7172	31.3093	6.09135e-06	0.39294	up	--
EVM0007559	pqm-1	12.7382	13.4028	12.4729	17.8153	17.2707	15.963	2.3968e-06	0.392599	up	--
EVM0010990	Y71A12C.2	0.781484	0.880043	1.3897	1.58796	1.49034	1.61806	0.035475	0.392243	up	SNARE associated Golgi protein
EVM0002815	C34C6.4	7.69756	8.99925	8.70767	11.7859	10.0481	11.8168	1.63943e-05	0.391055	up	GMC oxidoreductase
EVM0004694	lin-29	0.845008	0.877051	0.914784	0.99902	1.52447	1.28944	0.0228838	0.390528	up	Zinc finger, C2H2 type
EVM0008434	pfk-1.2	0.85317	0.783756	0.643189	1.09284	1.24622	1.06308	0.0303241	0.39035	up	Phosphofructokinase
EVM0009352	--	99.0114	99.4458	99.2933	122.539	130.002	135.908	4.36913e-13	0.389764	up	Immediate early response protein (IER)
EVM0007332	kmo-1	17.0357	16.8281	17.3239	22.2794	22.4177	22.4651	5.59828e-08	0.389032	up	FAD binding domain
EVM0006112	F07E5.5	9.9814	10.1472	11.1138	14.4852	13.273	13.5408	1.40532e-05	0.388547	up	Zinc knuckle
EVM0017254	C09F12.2	14.9105	14.5054	15.6537	20.4308	20.7351	18.0775	7.83625e-07	0.388295	up	--
EVM0009199	JC8.2	24.3961	24.1569	24.4123	30.3366	30.894	34.2209	7.243e-09	0.387198	up	WD domain, G-beta repeat
EVM0005281	F55F10.1	10.515	10.2814	10.0945	13.4761	13.0523	13.701	2.12019e-12	0.386376	up	AAA domain (dynein-related subfamily)
EVM0010326	set-18	18.5307	20.7448	21.4889	27.0307	27.0392	25.4335	1.13264e-07	0.386262	up	MYND finger
EVM0000824	T20B12.3	6.48037	7.04045	7.33091	8.82904	9.30386	9.36952	2.07609e-05	0.385351	up	CBF/Mak21 family
Caenorhabditis_elegans_newGene_1904	--	5.31405	4.53149	10.5015	13.7802	15.6197	11.8185	0.0384941	0.38525	up	--
EVM0009699	clec-4	31.1281	31.0052	34.0355	40.5639	40.9956	43.8901	5.78014e-09	0.384937	up	Lectin C-type domain
EVM0013939	--	8.41725	7.62677	8.3933	10.9043	10.5033	11.1226	0.000349646	0.383339	up	--
EVM0008515	--	7.27317	7.69142	7.52638	9.76485	11.4426	9.79403	0.00956688	0.3831	up	Calponin homology (CH) domain
EVM0002498	R74.10	10.7548	11.1297	12.4058	15.0517	15.4008	14.8753	0.000128894	0.382007	up	Saposin-like type B, region 2
EVM0015069	eif-2Bbeta	13.2608	14.6599	12.8146	19.9087	15.9155	18.1966	0.000217734	0.381857	up	Initiation factor 2 subunit family
EVM0004134	T01B7.5	15.8777	15.1626	16.6438	20.5306	20.4255	21.1082	4.29508e-09	0.381736	up	Sas10 C-terminal domain
EVM0010118	Y57A10A.27	22.1246	21.5602	24.0192	28.2111	30.1019	29.8016	3.15887e-08	0.380307	up	--
EVM0011078	fmo-1	11.8969	12.7292	11.2527	14.8725	15.287	17.0444	4.34295e-05	0.380238	up	Flavin-binding monooxygenase-like
EVM0008469	vhp-1	66.6217	64.4838	68.1505	85.3864	87.5302	84.7432	3.37982e-13	0.378549	up	Dual specificity phosphatase, catalytic domain
EVM0006182	--	52.1075	50.5204	53.9064	68.9822	69.3804	64.866	4.88817e-09	0.378529	up	--

## Sheet: 262 down-regulated DEGs
#ID	Homologous gene in C. elegans	DMSO-1_FPKM	DMSO-2_FPKM	DMSO-3_FPKM	SA-1_FPKM	SA-2_FPKM	SA-3_FPKM	FDR	log2FC	regulated	gene_description
EVM0010655	mpst-3	3.52594	3.03882	3.47508	2.60014	2.19477	2.02165	0.0288928	-0.378729	down	Rhodanese-like domain
EVM0005520	clec-146	15.9495	16.6742	17.8953	12.8226	12.7037	11.6996	0.000207986	-0.379661	down	Lectin C-type domain
EVM0010643	F52D10.4	5.43581	5.23081	5.32341	4.56869	3.82982	2.90532	0.0124333	-0.379697	down	--
EVM0014243	Y53F4B.23	24.3103	22.7453	26.3273	19.7323	17.6774	17.0127	2.78215e-05	-0.380285	down	--
EVM0015851	Y32F6A.4	6.71239	7.2755	6.3338	4.45667	5.01793	5.37282	0.000816824	-0.380475	down	Transmembrane amino acid transporter protein
EVM0010157	--	3.08692	3.17846	4.37443	2.76125	2.40238	1.91674	0.0342336	-0.380881	down	--
EVM0010902	dhs-28	126.784	131.335	125.972	94.4244	93.5264	100.486	6.59586e-12	-0.38224	down	short chain dehydrogenase
Caenorhabditis_elegans_newGene_1150	--	4.01669	3.06721	3.79914	2.05275	2.75007	2.53864	0.00968879	-0.382557	down	--
EVM0005645	C30B5.7	3.26801	3.61176	3.25562	2.4927	2.3789	2.22515	0.0139676	-0.382563	down	Serpentine type 7TM GPCR chemoreceptor Srsx
EVM0017157	cest-13	0.680242	0.854153	0.71716	0.484036	0.33598	0.441753	0.04877	-0.382896	down	Carboxylesterase family
EVM0006983	--	59.6194	48.5066	71.8501	41.3996	44.5929	31.0465	0.0374879	-0.383602	down	--
EVM0007594	gln-3	52.1909	55.038	54.7865	39.8536	39.2912	42.0561	5.75769e-10	-0.384034	down	Glutamine synthetase, catalytic domain
EVM0002564	--	264.949	236.033	250.383	189.871	204.89	162.103	7.20097e-06	-0.384235	down	--
EVM0002502	C50B6.7	7.95602	7.88297	8.42439	6.01148	5.88418	6.03868	1.9522e-05	-0.384548	down	Alpha amylase, catalytic domain
EVM0002826	nfki-1	197.036	194.093	184.32	165.295	133.077	128.305	5.35915e-06	-0.384699	down	Ankyrin repeats (3 copies)
EVM0005422	--	13.897	15.3739	15.2729	11.2638	11.5436	9.77073	0.000325014	-0.385107	down	--
EVM0002805	mpst-1	104.373	115.765	110.473	82.7475	80.6124	84.1151	1.5058e-11	-0.3854	down	Rhodanese-like domain
EVM0017425	madf-2	6.13723	5.74588	4.84897	4.59033	3.88728	3.53318	0.00392962	-0.385458	down	Alcohol dehydrogenase transcription factor Myb/SANT-like
EVM0006084	coel-1	50.5012	53.7144	53.3945	40.5721	37.2344	39.9417	9.44392e-10	-0.385592	down	Leucine Rich repeats (2 copies)
Caenorhabditis_elegans_newGene_1098	--	1.52035	1.85544	2.01329	1.23895	1.20716	1.36626	0.00872516	-0.385745	down	Amino acid permease
Caenorhabditis_elegans_newGene_144	--	1.31781	1.77854	1.73469	1.25097	0.984228	0.834564	0.0391943	-0.387078	down	--
EVM0015701	aakg-4	8.66727	9.53337	10.3998	7.34353	6.99905	6.7642	8.9542e-06	-0.387396	down	CBS domain
EVM0014925	F43C9.1	5.98122	5.90175	6.55254	3.75895	4.66502	4.78516	0.00307258	-0.387748	down	F-box domain
EVM0008337	pes-9	14.4597	15.4534	12.8251	11.4887	9.59948	10.1587	0.000180834	-0.389017	down	Peptidase family M20/M25/M40
EVM0001990	Y4C6B.7	32.5601	35.2745	34.7394	28.2515	21.9018	24.9812	8.36098e-05	-0.390053	down	--
EVM0009345	--	21.458	20.8805	19.6085	17.6186	14.1139	12.7672	0.0023645	-0.390211	down	--
EVM0014278	--	15.1198	14.0282	15.3206	10.8728	10.4285	11.4727	7.11446e-06	-0.390306	down	Collagen triple helix repeat (20 copies)
EVM0007464	ZK1307.7	3.81311	3.91323	3.5789	2.57887	2.85595	2.32768	0.0155496	-0.391179	down	7 transmembrane receptor (rhodopsin family)
EVM0001476	C06B8.7	2.24183	2.63871	2.97776	2.01916	1.84156	1.88212	5.78455e-05	-0.391486	down	Scavenger receptor cysteine-rich domain
EVM0015491	--	5.53386	5.12904	7.10665	4.76663	3.80693	2.47173	0.0384102	-0.391705	down	--
EVM0013355	ipla-6	14.4948	14.5515	11.0101	10.0709	9.32408	8.28554	0.0133553	-0.392131	down	Patatin-like phospholipase
EVM0008629	C38C3.4	4.89538	5.3624	4.96248	3.74844	3.4252	3.74795	0.00179822	-0.392148	down	Protein kinase domain
EVM0009845	thn-1	4.85767	5.15744	7.45628	5.1114	3.57357	3.03056	0.0220788	-0.392421	down	Thaumatin family
EVM0007875	daf-7	4.91243	5.67303	7.16057	4.06055	4.22203	3.8734	0.0140714	-0.3925	down	Transforming growth factor beta like domain
Caenorhabditis_elegans_newGene_3071	--	1.66627	1.67361	2.03141	1.35048	1.30229	1.05643	0.0122149	-0.393008	down	--
EVM0017056	msd-4	2.30324	2.15116	2.94294	1.55998	1.59569	1.94551	0.0119565	-0.393592	down	MSP (Major sperm protein) domain
EVM0000777	npr-10	7.15475	6.82779	6.7625	5.5766	4.91839	4.3904	0.001652	-0.393681	down	7 transmembrane receptor (rhodopsin family)
EVM0005687	T28H10.3	9.9365	9.91888	12.5144	7.86927	8.04883	7.63708	0.000131997	-0.393726	down	Peptidase C13 family
EVM0007334	R13H4.2	124.901	121.464	134.62	93.3728	96.335	93.6319	5.31857e-12	-0.394222	down	--
EVM0008708	dhs-9	34.6565	42.7354	43.8286	28.2557	29.6006	31.2702	1.53003e-06	-0.394551	down	short chain dehydrogenase
EVM0015377	atg-18	17.0139	16.5891	17.0134	13.7282	11.3396	11.9958	3.26407e-05	-0.394616	down	Family of unknown function (DUF5711)
EVM0012549	C05C12.6	5.42006	4.33426	3.49246	3.11278	3.14286	2.76945	0.0163522	-0.39588	down	--
Caenorhabditis_elegans_newGene_139	--	2.03719	2.34685	2.02422	1.54417	1.66467	1.27942	0.0163009	-0.395994	down	Serpentine type 7TM GPCR receptor class ab chemoreceptor
EVM0015122	ttr-36	43.1752	47.1817	44.7728	34.3082	30.9417	33.6665	1.47108e-05	-0.396012	down	Transthyretin-like family
EVM0007565	hsp-16.11	39.6188	42.4724	44.0549	29.5626	30.2405	32.5016	7.91027e-06	-0.396529	down	Hsp20/alpha crystallin family
EVM0015241	tag-196	31.0646	32.4138	33.4491	25.1033	23.0221	23.5823	4.38445e-09	-0.396927	down	Papain family cysteine protease
EVM0009444	myo-3	106.769	102.874	123.433	90.6913	80.0888	74.2036	3.70793e-07	-0.397139	down	Myosin head (motor domain)
EVM0000209	ccch-1	46.0025	45.9405	47.5726	27.5189	37.2219	37.2913	1.45932e-05	-0.397245	down	Zinc finger C-x8-C-x5-C-x3-H type (and similar)
EVM0013510	hsp-16.48	27.3827	27.3288	26.3501	17.542	20.6291	20.6152	0.000163879	-0.397261	down	Hsp20/alpha crystallin family
EVM0009364	srg-32	0.837738	0.861594	0.87564	0.58581	0.377627	0.334433	0.0355877	-0.397271	down	Srg family chemoreceptor
EVM0007170	pyc-1	89.1466	98.8859	90.5665	67.5665	65.9777	73.0603	4.35936e-11	-0.397497	down	Carbamoyl-phosphate synthase L chain, ATP binding domain
EVM0014481	--	24.6671	23.8244	20.1688	18.1037	16.097	15.891	4.69374e-05	-0.397827	down	F-box domain
EVM0010594	rhy-1	13.0643	13.4639	11.5979	9.13104	9.20405	9.58319	6.69994e-06	-0.398614	down	Acyltransferase family
EVM0001153	--	2.1289	1.52073	1.76209	0.896272	1.39674	1.19966	0.0269061	-0.399264	down	--
EVM0014323	--	4.64762	5.08536	3.75987	2.97938	3.31068	2.91332	0.0124333	-0.399896	down	Serpentine type 7TM GPCR receptor class ab chemoreceptor
EVM0013631	F36G3.2	31.5748	29.9816	26.0379	20.5316	22.7845	20.6702	1.26187e-05	-0.40015	down	Acetyltransferase (GNAT) domain
EVM0013258	--	47.4542	41.8749	46.3603	33.426	36.193	28.3685	0.000221385	-0.400578	down	--
Caenorhabditis_elegans_newGene_2915	--	249.87	233.574	270.381	198.561	187.94	167.022	1.93838e-07	-0.401097	down	--
EVM0000987	Y71A12C.2	7.47715	6.81066	6.40409	5.95816	4.54468	3.99174	0.0046899	-0.40182	down	SNARE associated Golgi protein
EVM0002751	gln-2	1.71462	2.28847	1.3077	1.06502	1.04816	1.15955	0.0317671	-0.402403	down	Glutamine synthetase, catalytic domain
EVM0010113	Y48A6B.7	118.149	124.389	118.279	96.7604	83.6175	85.025	2.60206e-08	-0.402557	down	Cytidine and deoxycytidylate deaminase zinc-binding region
EVM0013446	glb-20	17.616	15.1915	13.6163	12.4301	9.97579	11.0674	0.000276746	-0.402689	down	--
EVM0008743	R04B5.5	1.78647	2.41778	2.16484	1.32785	1.24461	1.52909	0.0235648	-0.402927	down	Alcohol dehydrogenase GroES-like domain
EVM0016479	dop-4	14.4168	13.4444	13.4922	11.4211	9.45402	9.10892	4.68046e-05	-0.404491	down	7 transmembrane receptor (rhodopsin family)
EVM0013796	R01H10.4	12.875	14.4542	14.9334	10.7342	9.72495	9.74585	0.00045373	-0.404603	down	--
EVM0009203	--	11.4664	13.8479	15.504	10.8607	7.87643	9.95982	0.00236568	-0.404683	down	--
EVM0015740	daf-37	3.99451	2.77748	2.68426	2.00656	2.38138	2.07648	0.00965129	-0.405952	down	7 transmembrane receptor (rhodopsin family)
EVM0005924	--	17.4501	16.7102	16.071	10.1221	12.1789	11.7011	0.0110006	-0.406185	down	--
EVM0015578	F13B12.4	98.0119	107.004	90.2558	74.7729	67.3358	74.4727	3.73283e-08	-0.406193	down	Pyridoxal-phosphate dependent enzyme
EVM0003549	ttr-52	6.28597	5.57569	6.09316	4.36621	3.99492	3.04193	0.0251085	-0.406197	down	Transthyretin-like family
EVM0002165	--	50.1046	51.7901	79.7923	42.1151	35.0673	36.5177	0.0269173	-0.406354	down	--
EVM0014915	nit-1	8.20092	6.96682	6.64006	4.9683	5.4531	4.84427	0.0032998	-0.406707	down	Carbon-nitrogen hydrolase
EVM0004048	bcs-1	31.663	35.7251	54.5889	26.5156	25.2008	21.351	0.0312534	-0.40672	down	BCS1 N terminal
EVM0017236	cpr-6	60.8012	60.5081	63.4213	47.2405	43.7736	44.9941	1.4011e-11	-0.407061	down	Papain family cysteine protease
EVM0007244	daf-38	9.33872	9.60376	9.9989	6.48063	7.38683	6.82924	0.00028743	-0.407335	down	7 transmembrane receptor (rhodopsin family)
EVM0004184	npr-5	25.6495	20.7638	19.0434	16.2711	15.3923	15.6536	6.22333e-05	-0.407564	down	7 transmembrane receptor (rhodopsin family)
EVM0014635	mod-1	11.9219	12.7276	10.8172	9.13356	8.78901	7.72129	2.95878e-05	-0.408016	down	Neurotransmitter-gated ion-channel ligand binding domain
EVM0002490	F41E6.5	2.61542	2.37263	2.17702	1.30975	1.76449	1.56766	0.0202065	-0.408122	down	FMN-dependent dehydrogenase
Caenorhabditis_elegans_newGene_35	--	56.8869	50.8901	72.9598	46.3108	34.2905	37.8379	0.0175012	-0.408463	down	Transthyretin-like family
EVM0013037	T16G1.5	55.1014	59.8484	57.6495	42.1923	43.353	41.2419	3.20812e-11	-0.408914	down	Protein of unknown function (DUF1679)
EVM0013079	sma-1	5.17035	5.13729	5.39196	4.12361	3.90353	3.16031	0.000404185	-0.409446	down	Calponin homology (CH) domain
EVM0014321	T12A7.6	2.40323	2.83738	2.76112	1.93201	1.84034	1.59925	0.0117052	-0.409477	down	--
EVM0009621	npr-7	6.58355	7.00366	7.14457	5.32813	5.13375	4.25569	0.000533394	-0.410184	down	7 transmembrane receptor (rhodopsin family)
EVM0005573	nhr-19	19.0862	16.3416	11.9076	10.8664	7.96838	6.14032	0.0300231	-0.411513	down	Zinc finger, C4 type (two domains)
EVM0008934	tyr-5	20.4539	23.2377	25.3007	16.8222	17.7468	15.3623	1.61662e-06	-0.413058	down	Common central domain of tyrosinase
EVM0011527	--	16.0635	17.5333	19.8641	13.5791	12.8761	10.4061	0.00393135	-0.41318	down	ShK domain-like
EVM0006196	F07H5.7	44.6933	41.8753	38.7481	32.2922	24.4295	18.143	0.0277689	-0.413341	down	--
Caenorhabditis_elegans_newGene_2186	--	94.5532	83.0942	114.278	71.9885	67.3966	70.7588	1.16628e-05	-0.414675	down	--
EVM0012735	ZK1010.8	6.6811	6.37517	6.62343	5.31002	4.49519	4.06256	0.000808805	-0.415017	down	--
EVM0008431	C05D12.7	10.1782	11.7807	9.82612	6.1001	7.64238	7.41967	0.0102564	-0.41622	down	--
EVM0015867	pck-2	1194.01	1263.38	1121.35	867.639	829.099	920.664	1.7232e-11	-0.416603	down	Phosphoenolpyruvate carboxykinase C-terminal P-loop domain
EVM0008549	cpz-1	51.6644	54.3631	51.6316	38.8822	35.6047	40.4078	1.01336e-09	-0.417133	down	Papain family cysteine protease
EVM0003947	--	16.6298	17.0431	15.6816	11.7679	11.2132	12.1336	0.000131997	-0.417225	down	Avidin family
EVM0001117	--	2.59362	2.64685	1.7372	1.83006	1.14482	1.07455	0.0256621	-0.419896	down	--
EVM0017558	T10H9.1	3.51503	4.25311	2.87069	2.22472	1.84766	2.68465	0.0167977	-0.420243	down	--
EVM0000886	--	8.33963	10.9451	11.3999	7.54696	5.09975	4.23811	0.0259474	-0.421146	down	--
EVM0005328	nhr-14	91.1485	84.2266	91.7372	72.9457	64.2783	54.9564	1.475e-06	-0.421297	down	Zinc finger, C4 type (two domains)
EVM0009311	gnrr-5	10.3075	9.52916	10.573	7.63941	7.72097	6.29721	5.45217e-05	-0.421299	down	7 transmembrane receptor (rhodopsin family)
EVM0006839	msra-1	159.458	162.48	173.984	123.431	120.342	117.459	1.29107e-14	-0.423898	down	Peptide methionine sulfoxide reductase
EVM0001500	--	0.631387	0.704274	0.562757	0.308518	0.395543	0.370334	0.0240726	-0.424587	down	--
EVM0016246	--	6.88642	6.19128	7.182	3.94733	4.44608	2.77351	0.0243228	-0.425109	down	--
EVM0002853	--	16.2237	15.6187	18.4476	12.7642	11.343	9.9017	0.00430699	-0.425477	down	--
EVM0003171	--	12.9278	11.8935	11.1314	9.21601	7.95782	7.69243	0.00153364	-0.425589	down	Hsp20/alpha crystallin family
EVM0001898	hsp-12.2	269.79	275.541	238.787	199.166	186.002	181.41	1.57038e-09	-0.428048	down	Hsp20/alpha crystallin family
EVM0000920	--	64.3742	61.542	102.011	48.6132	45.1252	35.1611	0.0223834	-0.428505	down	--
EVM0002570	lec-11	43.3392	43.838	47.4396	35.5769	29.9769	31.0094	2.28664e-07	-0.428633	down	Galactoside-binding lectin
EVM0007986	npr-13	4.94397	5.48461	6.17045	4.16185	3.94977	3.26917	0.00166077	-0.428964	down	7 transmembrane receptor (rhodopsin family)
EVM0003122	lact-2	3.48618	3.31538	3.91263	2.20418	2.34282	2.66425	0.00363766	-0.430731	down	Beta-lactamase
EVM0013333	--	7.58023	10.3	11.7261	7.39577	6.72156	5.79429	0.00332423	-0.431855	down	Sid-5 family
EVM0012593	--	1.23825	1.0873	0.942255	0.704416	0.550644	0.537376	0.0210354	-0.433026	down	--
EVM0014724	Y41E3.22	16.9039	15.1509	16.712	9.36261	11.1644	12.3661	0.00295876	-0.433404	down	--
EVM0016845	prk-2	30.396	26.772	23.1852	20.3625	14.6642	13.2957	0.0174786	-0.433552	down	Protein kinase domain
EVM0011288	ntr-1	4.40561	3.43363	3.53194	2.58773	2.75296	2.10749	0.0074727	-0.434547	down	7 transmembrane receptor (rhodopsin family)
Caenorhabditis_elegans_newGene_1030	--	15.0477	14.2099	15.2606	8.75822	11.9155	9.58889	0.00158661	-0.435063	down	--
EVM0012133	C51E3.6	5.03264	4.29621	5.43131	3.49334	3.27927	3.43217	0.000423715	-0.435365	down	Permease family
EVM0001991	pxmp-4	22.1358	20.9189	20.8515	14.513	16.3542	14.3743	6.76885e-06	-0.435391	down	Tim17/Tim22/Tim23/Pmp24 family
EVM0014558	Y17G7B.17	62.4491	58.5391	65.9682	47.3095	44.662	42.3088	1.78619e-10	-0.436131	down	Myelodysplasia-myeloid leukemia factor 1-interacting protein
EVM0007095	--	4.10337	5.30554	5.2876	3.64013	2.96875	3.3423	0.00154684	-0.4373	down	Granulin
EVM0008310	F46G10.1	50.5409	55.5812	65.7953	43.3651	40.2802	38.4783	1.25785e-07	-0.439394	down	BTB/POZ domain
EVM0010242	clec-146	194.825	220.462	222.709	150.452	156.303	151.369	3.99947e-14	-0.441349	down	Lectin C-type domain
EVM0005172	mlt-10	1.31435	1.39277	1.39749	1.1706	0.72406	0.617978	0.0124395	-0.44252	down	Moulting cycle
EVM0011269	T28B11.1	29.5906	27.5561	23.4225	20.1822	19.193	17.4448	8.35953e-07	-0.447027	down	--
Caenorhabditis_elegans_newGene_74	--	6.44239	7.06836	9.00494	6.05627	4.65747	4.74826	0.000152078	-0.447874	down	--
EVM0009922	--	4.01956	4.22436	4.56555	3.01618	2.82522	2.61877	0.00230414	-0.449766	down	N-terminal of Homeobox Meis and PKNOX1
EVM0004196	R09H10.5	1.65326	2.18528	3.23221	1.51806	1.68382	1.32338	0.00502945	-0.450312	down	--
EVM0014197	mfb-1	22.7903	21.9084	23.9505	17.3115	14.984	16.3852	1.29696e-09	-0.450452	down	--
EVM0012886	unk-1	75.3185	68.0447	68.186	54.5648	48.522	47.0044	3.41277e-10	-0.451935	down	Unkempt Zinc finger domain 1 (Znf1)
EVM0001556	--	13.3112	10.9427	8.59107	6.84614	8.28046	6.43979	0.00274993	-0.453593	down	--
Caenorhabditis_elegans_newGene_2065	--	28.1072	21.8506	24.366	20.5353	15.6085	13.2022	0.00154294	-0.454543	down	--
EVM0015877	frpr-7	8.45038	8.90345	6.72893	6.206	5.70439	4.27057	0.000664313	-0.456118	down	7 transmembrane receptor (rhodopsin family)
EVM0008950	F42G8.8	1.16679	0.698085	0.763544	0.584515	0.36528	0.487305	0.0136036	-0.45634	down	Calcineurin-like phosphoesterase
EVM0011119	R02D5.6	1.3646	1.50243	1.37201	0.858956	0.531447	0.686528	0.0132688	-0.456575	down	--
EVM0017461	Y71F9B.13	59.3023	59.545	58.6472	44.6438	41.6364	38.9006	1.95229e-09	-0.456782	down	--
EVM0016411	Y71H2AM.12	8.60381	9.22293	9.20005	6.39596	6.17472	5.27375	0.00130058	-0.458379	down	Ras family
EVM0012702	nhr-6	5.68706	5.60862	5.59049	4.51803	3.67044	3.27272	0.000160111	-0.460275	down	Zinc finger, C4 type (two domains)
EVM0006577	frpr-3	4.91971	4.91683	4.69015	3.45878	3.56336	2.42292	0.00215366	-0.460964	down	7 transmembrane receptor (rhodopsin family)
EVM0000127	Y42G9A.1	4.08145	3.47995	4.50289	3.396	2.12152	1.97329	0.00613385	-0.460976	down	--
EVM0002682	tag-353	17.6135	18.2695	18.1662	12.3287	13.7271	11.9544	2.62351e-10	-0.461311	down	Ubiquitin family
Caenorhabditis_elegans_newGene_207	--	1.70968	1.96449	2.00158	1.10186	1.12184	1.31101	0.00269264	-0.464545	down	Carboxylesterase family
EVM0000381	abts-1	24.0634	23.1362	25.0736	18.4314	16.111	16.1965	1.58921e-11	-0.467112	down	HCO3- transporter family
EVM0011270	dhs-20	9.07579	9.31397	10.9224	6.61303	6.60293	6.8273	1.02271e-05	-0.467862	down	short chain dehydrogenase
EVM0003700	lin-45	11.4028	13.1713	12.5912	8.25252	9.16237	8.30567	2.02355e-07	-0.467946	down	Protein kinase domain
EVM0002375	--	73.9335	74.3663	69.8469	50.8938	50.6857	51.6097	2.87099e-12	-0.468532	down	--
EVM0000596	dhs-27	3.13768	3.22301	3.59326	2.20623	2.08686	2.12318	0.00152014	-0.470974	down	short chain dehydrogenase
EVM0014888	sre-8	10.2027	9.39064	9.08071	7.7385	6.43284	4.40153	0.00137099	-0.471897	down	C. elegans Sre G protein-coupled chemoreceptor
EVM0010337	--	2.01663	1.88708	2.21733	1.14533	0.909524	1.39981	0.00869966	-0.472631	down	C. elegans Sre G protein-coupled chemoreceptor
EVM0007644	Y39H10A.6	43.1037	39.0745	33.7747	29.5946	25.4602	25.0251	3.1052e-07	-0.472644	down	WD domain, G-beta repeat
EVM0015993	R08E5.3	18.0196	21.6858	21.7385	13.6268	13.8333	14.9941	2.98875e-08	-0.47341	down	Methyltransferase domain
EVM0008832	Y51F10.7	270.39	291.63	304.658	194.454	209.396	205.262	2.55307e-18	-0.473432	down	--
EVM0006948	--	1.95095	2.01641	2.3047	0.994859	1.20212	1.20672	0.00926713	-0.474046	down	--
EVM0000078	cutl-3	24.2636	24.9882	24.7654	19.0828	15.8037	16.5628	9.68271e-10	-0.474731	down	--
EVM0011820	--	4.37597	3.5953	3.74414	2.75143	2.53589	2.15299	0.00218365	-0.475747	down	Serpentine type 7TM GPCR chemoreceptor Srx
EVM0010446	--	7.44815	7.03	6.99658	5.44848	5.15995	3.80015	7.47077e-05	-0.475876	down	--
EVM0003946	frpr-1	6.60304	6.01285	6.01744	4.85421	4.269	3.13821	0.000423632	-0.476158	down	--
EVM0004240	scav-6	7.61382	8.31081	8.51173	5.1486	5.67649	5.87086	9.36286e-07	-0.476632	down	CD36 family
EVM0001817	tyr-1	58.1564	60.2084	70.2448	45.5712	42.6566	43.1519	1.92651e-12	-0.477015	down	Common central domain of tyrosinase
EVM0005461	F07H5.7	102.709	95.5438	87.121	66.7912	54.911	38.3077	0.00763936	-0.47933	down	--
EVM0004911	ZK669.2	11.6983	12.825	17.7858	9.72297	6.15433	6.6078	0.00835638	-0.480977	down	Gamma interferon inducible lysosomal thiol reductase (GILT)
EVM0004443	ZK455.5	11.5655	11.9723	13.4579	8.73234	8.00163	8.35547	3.45472e-06	-0.481042	down	Nucleotide-diphospho-sugar transferase
EVM0017110	--	9.45265	8.64797	8.61955	6.39372	6.36898	4.76103	0.000328614	-0.481131	down	Cation efflux family
EVM0013888	egas-1	6.06126	6.32813	6.17894	4.43322	4.31041	3.90374	1.31388e-06	-0.481199	down	Amiloride-sensitive sodium channel
EVM0010354	tsp-6	39.9226	39.4841	40.2277	30.376	25.5253	26.4917	1.1228e-08	-0.481712	down	Tetraspanin family
EVM0003969	F46C3.2	10.3053	10.4191	8.08986	7.18525	6.37618	5.49587	0.000161487	-0.482643	down	--
EVM0005297	ttr-46	43.0312	41.8875	44.6984	30.8657	28.8073	29.3523	1.7961e-08	-0.483367	down	Transthyretin-like family
EVM0006607	--	19.3729	21.013	16.6738	15.3047	12.249	10.2461	0.000116787	-0.483767	down	--
Caenorhabditis_elegans_newGene_542	--	8.71057	8.30923	9.13179	6.04182	6.06054	5.5081	8.47926e-06	-0.48417	down	--
EVM0004484	ttr-35	68.6612	71.041	68.0913	48.5226	47.3427	47.585	7.24087e-11	-0.485776	down	Transthyretin-like family
EVM0014248	--	10.2798	10.6079	11.8228	7.69831	6.34874	7.9845	3.95023e-06	-0.487204	down	Granulin
EVM0000598	srtx-1	3.40102	2.96483	2.52237	2.14136	1.83283	0.989066	0.0060679	-0.488916	down	--
EVM0011593	--	2.37381	3.29781	2.49815	1.65645	1.50188	1.08385	0.00680697	-0.49075	down	--
EVM0007577	icl-1	4.68118	4.51415	5.07664	3.28575	2.93841	3.41796	8.41642e-07	-0.491496	down	Malate synthase
EVM0000556	--	3.14015	2.56675	2.71526	1.74347	2.06446	1.71639	8.20133e-05	-0.494114	down	Calponin homology (CH) domain
EVM0010953	nac-2	8.4072	8.59838	8.1402	5.5821	5.62879	5.73789	3.802e-07	-0.495321	down	Sodium:sulfate symporter transmembrane region
EVM0004426	C33A12.4	1.39884	1.75212	1.3058	0.559853	0.91911	0.82909	0.00589867	-0.496695	down	--
EVM0016549	sip-1	5.11119	4.11	7.92242	4.11126	2.76338	3.14278	0.00327107	-0.497545	down	Hsp20/alpha crystallin family
EVM0013313	hsp-16.11	291.495	319.732	309.442	199.565	211.37	223.837	1.08333e-18	-0.499426	down	Hsp20/alpha crystallin family
EVM0011169	F22B5.4	3.02303	3.03257	3.8103	2.40253	1.70727	1.84681	0.00184793	-0.499791	down	--
EVM0015629	hmit-1.3	4.30601	5.45804	4.807	3.27779	2.98728	3.34696	8.515e-06	-0.501782	down	Sugar (and other) transporter
EVM0008001	--	209.362	96.6208	149.577	74.9206	59.6415	62.3305	0.0046294	-0.504393	down	--
Caenorhabditis_elegans_newGene_2587	--	44.0418	48.7166	68.5078	35.3003	30.0328	27.4124	0.00306031	-0.5044	down	--
EVM0007823	F17H10.2	20.7461	21.9721	20.2501	13.1801	14.2609	15.2212	3.53092e-10	-0.505039	down	--
EVM0003486	Y65B4BR.1	32.5615	35.4214	32.2521	22.7689	22.2215	23.354	7.39716e-13	-0.505404	down	GDSL-like Lipase/Acylhydrolase
Caenorhabditis_elegans_newGene_672	--	2.7617	3.48902	3.14452	2.11233	1.58253	1.35651	0.00433511	-0.509433	down	--
EVM0010969	tyr-3	4.48634	4.41227	5.12335	3.40384	3.07655	2.66932	1.65385e-05	-0.509696	down	Common central domain of tyrosinase
EVM0013778	--	1.50913	1.19193	1.59872	0.94769	0.56308	0.817919	0.00323965	-0.515965	down	Lanthionine synthetase C-like protein
EVM0014989	R02F2.1	160.173	162.784	141.868	101.407	106.648	106.717	1.35616e-14	-0.51836	down	Cyclin, N-terminal domain
EVM0004124	C44B12.6	10.0884	9.1791	11.6646	6.47612	7.02466	5.7916	0.00017215	-0.524141	down	Interleukin-17
EVM0003443	mnk-1	45.2995	43.521	33.9886	27.424	24.9064	23.9949	0.000182721	-0.526004	down	Protein kinase domain
EVM0013002	F14F9.5	4.72392	5.16819	4.84138	3.17816	3.22715	2.60387	0.000325566	-0.526315	down	Endonuclease/Exonuclease/phosphatase family
EVM0012800	--	5.51335	3.72113	4.66064	3.02653	2.9205	2.5098	0.000423715	-0.526733	down	--
EVM0012918	--	34.4121	37.6417	34.0723	22.8101	23.7165	23.9548	4.88659e-10	-0.527796	down	--
EVM0005515	--	1.50477	2.10688	1.85435	1.05315	0.552663	0.955499	0.00291697	-0.531093	down	--
EVM0003271	Y43F8B.1	66.5908	67.4542	71.8382	46.6875	45.8583	46.226	2.07156e-23	-0.532559	down	--
EVM0002518	DH11.2	3.92471	4.67261	4.81058	3.08738	2.58351	2.58952	0.000127081	-0.534611	down	--
EVM0002184	fbxl-1	4.63901	4.13122	4.48713	3.03981	2.86904	2.65973	1.03852e-06	-0.535301	down	Leucine Rich repeat
EVM0001339	F28G4.3	2.32193	1.82677	2.01383	1.26736	0.953114	1.21054	0.0014155	-0.536158	down	Protein of unknown function (DUF1647)
EVM0003661	R08E5.3	187.934	205.992	226.589	145.849	134.133	134.743	2.21233e-17	-0.536439	down	Methyltransferase domain
EVM0015844	M79.2	8.62582	7.44214	6.40466	5.76662	4.2319	4.19308	2.20131e-05	-0.536916	down	Acyltransferase
EVM0014801	vap-2	2.78396	2.7047	3.07391	2.15777	1.57503	1.37678	0.000374909	-0.537243	down	Cysteine-rich secretory protein family
EVM0001549	--	24.8392	21.7271	20.9797	16.5442	14.8486	12.8992	3.97631e-09	-0.539078	down	--
EVM0005403	Y69E1A.5	114.439	116.338	147.905	87.1272	84.5862	77.3188	1.43167e-10	-0.539226	down	Phosphatidylethanolamine-binding protein
EVM0015840	cyp-29A2	20.0578	20.8308	21.4685	14.766	12.356	14.0889	1.31788e-11	-0.539694	down	Cytochrome P450
EVM0002182	shpk-1	3.7785	4.18291	4.40818	2.74628	2.66678	2.18996	7.61829e-05	-0.542443	down	FGGY family of carbohydrate kinases, N-terminal domain
EVM0010436	--	64.7592	69.0034	68.6296	46.2906	47.1636	39.9672	3.18908e-12	-0.543863	down	--
EVM0013109	--	2.93455	3.07976	4.62386	1.97562	1.86956	1.43115	0.00202215	-0.544169	down	--
Caenorhabditis_elegans_newGene_1869	--	7.95834	8.3246	8.14901	5.3742	5.05729	5.14456	6.21222e-07	-0.547718	down	--
EVM0012251	--	9.317	8.87437	8.66699	5.16836	6.29582	5.34866	7.91027e-06	-0.549903	down	LIM domain
EVM0016981	mnk-1	190.317	175.585	139.934	109.614	99.8589	93.4819	0.000127831	-0.553637	down	Protein kinase domain
EVM0011386	drd-5	46.5365	48.197	48.1892	30.6105	32.9696	30.3798	1.87096e-15	-0.554743	down	short chain dehydrogenase
EVM0002043	svop-1	1.66089	2.25847	2.63799	1.49494	1.09288	1.08198	0.000530041	-0.556715	down	Major Facilitator Superfamily
EVM0005576	tag-10	16.6189	18.9147	18.0109	11.2382	11.8408	12.0123	1.87852e-15	-0.55812	down	WD40-like Beta Propeller Repeat
EVM0014526	daf-37	4.79019	5.35306	4.8015	2.49613	3.24798	3.36144	2.30808e-05	-0.558912	down	7 transmembrane receptor (rhodopsin family)
Caenorhabditis_elegans_newGene_3427	--	4.96215	5.25594	4.46762	3.72285	2.90618	2.37712	1.86889e-05	-0.559631	down	C. elegans Sre G protein-coupled chemoreceptor
EVM0006802	pax-3	3.28938	3.40128	2.67371	2.25991	1.50892	1.45832	0.000390054	-0.566719	down	'Paired box' domain
EVM0006956	--	16.6908	16.4478	13.3667	9.99756	10.4767	8.4674	9.22138e-08	-0.581404	down	Acetyltransferase (GNAT) domain
EVM0011711	aqp-1	12.7049	13.1315	14.3677	8.97051	8.06043	7.91846	1.9934e-08	-0.587917	down	Major intrinsic protein
EVM0002470	hsp-16.11	9.92603	9.55922	12.4904	6.37691	5.72126	6.95605	6.55711e-06	-0.588818	down	Hsp20/alpha crystallin family
EVM0013098	ZK550.6	17.9085	17.0958	16.2529	11.5893	10.7625	10.0274	1.7232e-11	-0.591281	down	Phytanoyl-CoA dioxygenase (PhyH)
EVM0014250	F23F1.2	15.1199	16.6299	16.769	10.9859	10.5088	9.34522	1.10378e-14	-0.592971	down	EF-hand domain pair
EVM0008205	--	187.929	171.14	228.174	114.698	132.019	122.198	2.85398e-12	-0.597887	down	--
EVM0011724	lin-45	3.99734	4.44218	4.5602	2.89841	2.70232	2.21629	8.34627e-07	-0.598841	down	Protein kinase domain
EVM0002998	atgl-1	22.2929	20.7807	16.6858	12.1539	12.4765	12.7434	7.52022e-11	-0.599902	down	Patatin-like phospholipase
EVM0009645	C30F2.2	8.29356	8.76984	7.64023	5.68083	5.03407	4.46999	1.47861e-08	-0.600775	down	PDZ domain
EVM0006503	M60.4	907.335	908.975	1175.95	602.063	644.873	643.377	1.12002e-15	-0.601526	down	--
EVM0005254	hphd-1	38.0086	41.0591	41.5747	27.6928	23.2857	24.9445	3.1946e-19	-0.615102	down	Iron-containing alcohol dehydrogenase
EVM0006502	cysl-2	175.466	180.726	168.211	118.711	104.392	108.079	4.99617e-23	-0.616967	down	Pyridoxal-phosphate dependent enzyme
EVM0010528	sul-2	7.53696	6.66993	5.44373	4.40789	3.88336	3.34104	2.01816e-07	-0.622439	down	Sulfatase
EVM0016088	--	20.8649	21.451	27.5347	15.1069	13.6009	12.4551	1.32146e-07	-0.624941	down	--
EVM0013141	F37A8.5	9.79819	9.35344	9.76675	5.55599	6.58444	5.46028	1.24463e-10	-0.625073	down	Yippee zinc-binding/DNA-binding /Mis18, centromere assembly
EVM0017011	tag-10	21.94	24.4748	26.3438	14.6012	14.2166	16.3239	1.19877e-17	-0.628038	down	WD40-like Beta Propeller Repeat
EVM0000301	--	10.0484	9.32757	9.68218	5.06903	5.09324	5.97676	9.34245e-06	-0.629617	down	--
EVM0009665	hsp-12.2	43.3087	50.7376	48.4091	30.614	28.8741	28.2789	6.47234e-16	-0.633217	down	Hsp20/alpha crystallin family
EVM0007473	B0416.3	3.35824	3.15659	2.69256	1.56532	1.65244	1.65691	2.66181e-05	-0.636829	down	--
EVM0014411	M01H9.3	215.647	213.926	199.226	138.843	128.644	123.187	3.84241e-23	-0.637731	down	--
EVM0012613	fil-1	50.0344	51.8747	48.6394	33.4602	30.6365	29.1789	2.74635e-22	-0.639427	down	Lipase (class 2)
EVM0002741	hsp-12.2	125.266	130.337	120.967	77.7918	75.3343	79.9881	1.34359e-29	-0.648573	down	Hsp20/alpha crystallin family
EVM0003175	pcm-1	2.6994	2.67239	3.79282	1.90668	1.26652	1.38899	5.02208e-05	-0.649122	down	Protein-L-isoaspartate(D-aspartate) O-methyltransferase (PCMT)
EVM0000025	--	19.7068	20.7864	22.932	11.6217	13.3268	13.2646	4.27965e-15	-0.654955	down	--
EVM0002519	lfi-1	0.32908	0.33364	0.282527	0.180989	0.125894	0.110077	9.76682e-05	-0.6562	down	Ciliary rootlet component, centrosome cohesion
EVM0007291	cysl-2	76.2222	77.6412	71.658	48.8102	43.1096	45.0682	3.78582e-23	-0.66572	down	Pyridoxal-phosphate dependent enzyme
EVM0016304	fld-1	2.35231	2.11166	1.67815	1.18921	0.991994	0.683498	4.66933e-05	-0.667765	down	TLC domain
EVM0002716	ethe-1	188.928	205.437	169.2	108.261	109.77	121.775	4.37884e-20	-0.669882	down	Metallo-beta-lactamase superfamily
EVM0010334	ethe-1	164.732	171.19	148.404	89.928	98.6448	103.829	1.14247e-21	-0.670973	down	Metallo-beta-lactamase superfamily
EVM0010015	F11E6.8	7.68129	8.8199	7.59605	4.71586	4.90451	4.36529	3.64792e-11	-0.674341	down	Protein tyrosine and serine/threonine kinase
EVM0004625	cest-2.1	1.80551	2.62009	2.42723	1.08272	1.28607	1.23537	1.62884e-06	-0.681063	down	Carboxylesterase family
Caenorhabditis_elegans_newGene_3001	--	25.8996	26.3605	28.355	17.7964	13.7362	15.131	1.20035e-11	-0.682095	down	--
EVM0006414	T21H3.1	4.86284	4.5098	3.69481	2.25824	1.738	2.52431	7.80065e-06	-0.68395	down	Lipase (class 3)
EVM0012130	hil-1	121.695	132.771	129.775	83.1771	70.8838	75.4461	8.124e-25	-0.687874	down	linker histone H1 and H5 family
EVM0008163	--	39.4288	38.4401	51.5498	29.382	21.2821	19.2761	1.69128e-07	-0.689077	down	--
EVM0013182	ZK863.8	14.1158	13.3297	13.7267	8.24803	8.42251	7.1692	6.25089e-13	-0.690727	down	--
EVM0011742	--	34.8535	33.9382	43.3208	24.5781	18.7109	20.1128	1.35778e-11	-0.703193	down	--
EVM0008802	clec-48	11.2368	10.3196	11.8986	6.23864	6.44258	5.78514	6.22972e-13	-0.736543	down	Lectin C-type domain
EVM0005728	clec-50	2.85302	3.22028	3.31901	1.4083	1.56288	1.63024	1.75451e-07	-0.744544	down	Lectin C-type domain
EVM0015214	dach-1	1.57949	1.90048	2.03294	0.888187	0.693414	0.796389	1.365e-06	-0.760886	down	Cytochrome P450
EVM0005936	pqn-74	8.64498	12.3967	10.1813	4.67336	4.64647	6.6783	1.01807e-09	-0.763944	down	Chitin binding Peritrophin-A domain
EVM0016076	dlc-1	16.527	18.204	20.9871	9.34561	9.50305	9.17487	1.80175e-09	-0.773092	down	Dynein light chain type 1
EVM0010924	oig-2	32.1823	34.916	39.0208	17.0921	19.9439	20.2205	9.05721e-17	-0.779319	down	Immunoglobulin I-set domain
EVM0016814	--	1.98872	2.20165	1.74065	0.98164	0.611148	0.440235	6.0455e-07	-0.815763	down	F-box domain
EVM0017357	ttr-44	44.6623	52.6626	46.3086	23.2832	25.0259	24.6682	3.19626e-23	-0.868919	down	Transthyretin-like family
EVM0009264	F41C6.7	7.50985	7.16191	7.55427	3.18178	3.57498	3.71817	1.83628e-13	-0.87652	down	Cation efflux family
EVM0009190	T03F6.6	27.1099	28.9394	25.8143	15.5636	11.8187	11.7568	1.86217e-16	-0.895455	down	TB2/DP1, HVA22 family
EVM0003257	lfi-1	17.2733	20.7001	17.9949	9.5802	8.37506	8.8981	2.39628e-43	-0.978413	down	Ciliary rootlet component, centrosome cohesion
