# Supplementary material
Source: MDPI journal article supplement (https://www.mdpi.com/2077-1312/10/3/428)
Supplement: s1 [file s1 › Supplementary File 3.pdf]

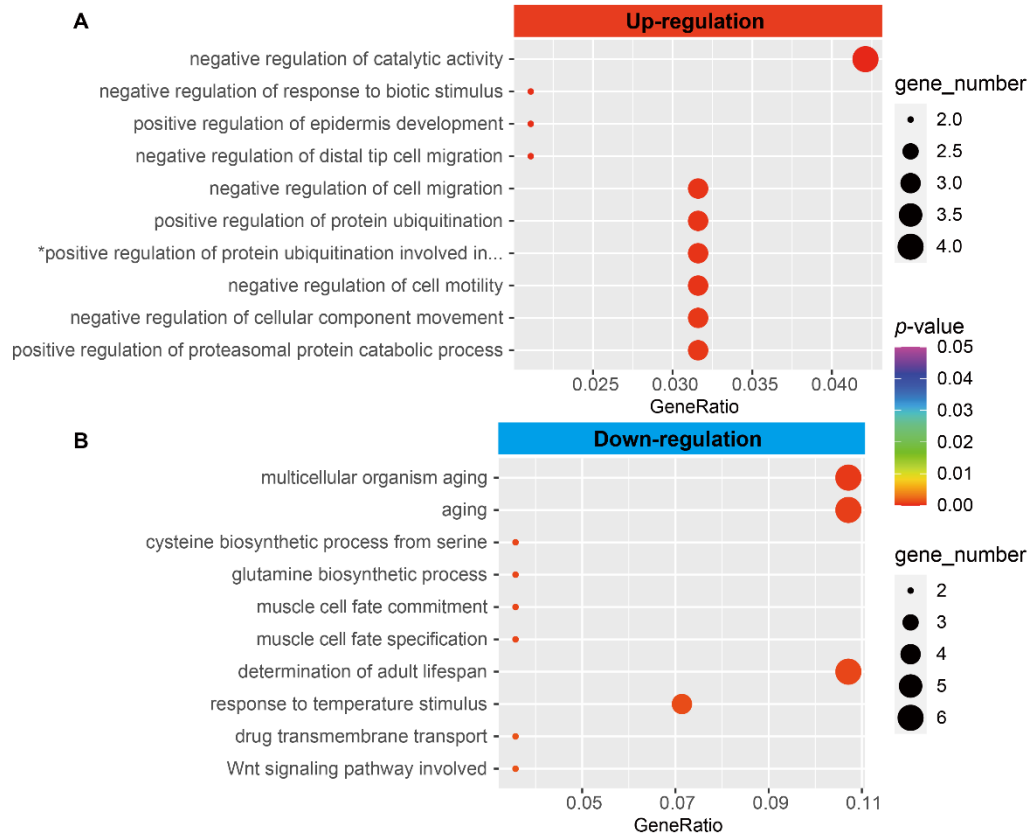

**Figure S1.** GO-BP (Biological Process) enrichment analysis for DEGs. **(A)** The top 10 enriched GO-BP terms for up-regulated DEGs. \*The full name of this term is “positive regulation of protein ubiquitination involved in ubiquitin-dependent protein catabolic process”. **(B)** The top 10 enriched GO-BP terms for down-regulated DEGs. The color from red to purple represents the significance of the enrichment. Gene ratio is the ratio of the number of DEGs annotated on the GO term to the total number of DEGs.

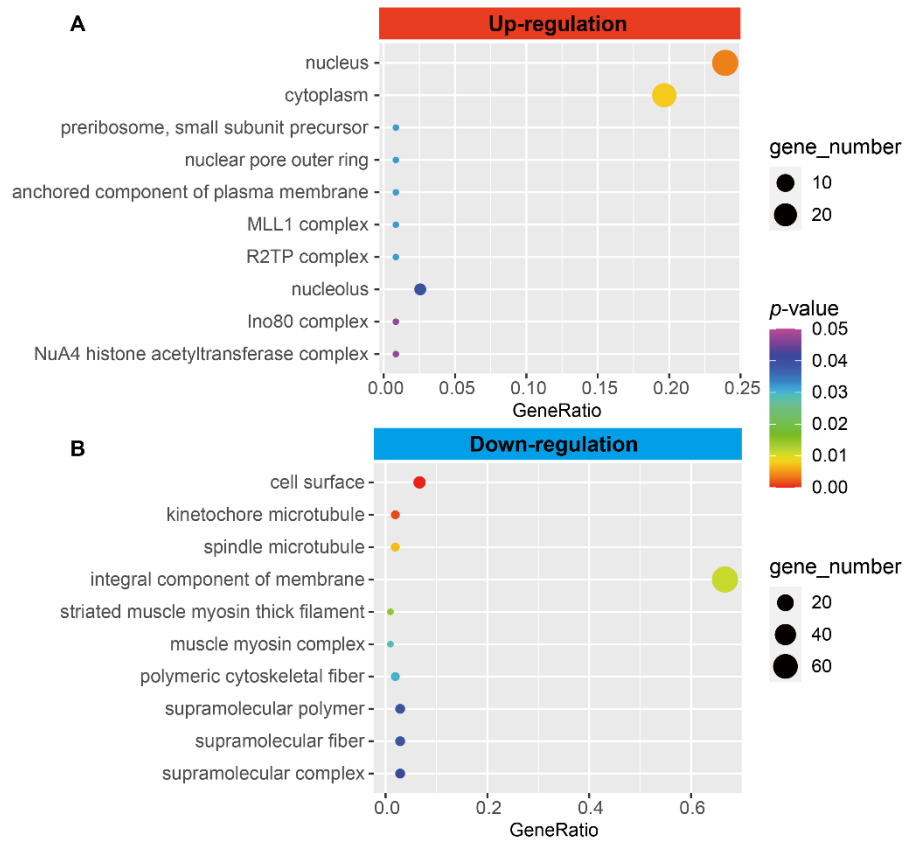

**Figure S2.** GO-CC (Cellular Component) enrichment analysis for DEGs. **(A)** The top 10 enriched GO-CC terms for up-regulated DEGs. **(B)** The top 10 enriched GO-CC terms for down-regulated DEGs. The color from red to purple represents the significance of the enrichment. Gene ratio is the ratio of the number of DEGs annotated on the GO term to the total number of DEGs.
