# Supplementary material
Source: MDPI journal article supplement (https://www.mdpi.com/2077-1312/10/3/428)
Supplement: s1 [file s1 › Supplementary File 4.xlsx]

## Sheet: Sheet1
	Fold change by RNA-seq#	Fold change by qPCR*	Correlation analysis
EVM0009296/gars-1	2.2558	2.78317	Pearson R	0.9354
EVM0009790/nars-1	2.07715	2.72332	95% confidence interval	0.7439 to 0.9850
EVM0003025/eif-6	1.49675	2.16877	P value (two-tailed)	< 0.0001
EVM0016791/M01G5.3	1.33742	1.67733	P value summary	***
EVM0007932/ZK795.3	1.32188	1.30522	Is the correlation significant? (alpha=0.05)	Yes
EVM0017539/F14E5.1	2.96998	2.77849	R squared	0.875
EVM0007205/mct-6	1.52258	1.62257
EVM0014526/daf-37	0.609281	0.799521
EVM0003946/frpr-1	0.658037	0.71831	#: Fold change indicates the average ratio of three biological replicates for each stearic acid (SA) supplementation group to the control DMSO supplementation group based on FPKM value.group to the control DMSO supplementation group based on FPKM value.
EVM0009311/gnrr-5	0.712194	0.633589	*: Fold change indicates the average ratio of three biological replicates for each stearic acid (SA) supplementation group to the control DMSO supplementation group calculated by the delta delta Ct method.
